# Supplementary material for: Mitochondrial stress response triggered by defects in protein synthesis quality control
Source: Life Sci Alliance. 2019 Jan 25;2(1):e201800219. doi: 10.26508/lsa.201800219 (PMC6348486; doi:10.26508/lsa.201800219)
Supplement: Supplementary file 6 [file LSA-2018-00219_Supplemental_Material_Data_Set_2.xlsx]

## Sheet: Sheet1
LFQ intensity control-37#1	LFQ intensity control-37#2	LFQ intensity control-37#3	LFQ intensity contol-37#4	LFQ intensity JH-37#5	LFQ intensity control-45#1	LFQ intensity control-45#2	LFQ intensity control-45#3	LFQ intensity control-45#4	LFQ intensity control-45#5	LFQ intensity delTA37#1	LFQ intensity delTA37#2	LFQ intensity delTA37#3	LFQ intensity delTA37#4	LFQ intensity delTA37#5	LFQ intensity delTA45#1	LFQ intensity delTA45#2	LFQ intensity delTA45#3	LFQ intensity delTA45#4	LFQ intensity delTA45#5	Peptides	Razor + unique peptides	Unique peptides	Sequence coverage [%]	Unique + razor sequence coverage [%]	Unique sequence coverage [%]	Mol. weight [kDa]	Q-value	Score	Intensity	MS/MS count	-LOG10 q value delTA /control 37	LOG2 fold change delTA/control 37	-LOG10 q value delTA /control 45	LOG2 fold change delTA/control 45		Protein IDs	Majority protein IDs	Protein names	Gene names
8.42361	8.23447	8.19053	7.90376	8.09506	7.9703	7.71912	7.9517	8.05561	7.83653	8.3498	8.05759	8.34618	8.22766	8.5055	8.31105	7.69013	8.09426	7.39305	7.69448	6	6	6	68.9	68.9	68.9	11.466	0	77.79	3912800000	99	0.240179	0.424741	0.089741	-0.23271		P82909;D6R941	P82909	28S ribosomal protein S36, mitochondrial	MRPS36
6.34767	6.60175	6.13721	6.27834	6.199	6.25202	6.24241	6.61278	6.02367	6.72126	6.39795	7.0323	6.41337	7.34494	7.00256	5.92357	6.3144	6.20707	6.78282	6.44794	3	3	3	11.7	11.7	11.7	29.842	0	4.8672	124980000	4	0.757864	1.74545	0	0		P82914	P82914	28S ribosomal protein S15, mitochondrial	MRPS15
7.48212	7.46494	7.67913	7.9422	7.67267	7.47292	7.68324	7.65288	7.93548	7.71712	7.76539	7.98289	7.82912	7.83176	7.6757	7.09999	7.20082	6.84041	6.82396	7.03403	10	10	10	33	33	33	50.364	0	34.297	1265000000	82	0.431603	0.560619	2.14862	-2.30039		Q9NP92	Q9NP92	28S ribosomal protein S30, mitochondrial	MRPS30
6.37327	7.69248	7.19296	6.85348	6.92115	6.299	6.53217	6.6161	6.67435	6.30074	7.17114	7.03451	6.73163	7.25969	6.52252	6.48953	6.68725	6.32623	5.83935	6.45231	2	2	2	24.6	24.6	24.6	15.173	0	7.7021	236120000	19	0.0373601	-0.20852	0.198598	-0.417027		O15235	O15235	28S ribosomal protein S12, mitochondrial	MRPS12
6.0033	7.08955	6.88988	6.48682	6.34779	6.32937	6.09962	6.44566	5.97681	6.36264	6.96049	6.81546	6.8801	7.06194	7.02173	5.99949	6.41311	6.44853	6.34079	6.34171	3	3	3	26.8	26.8	26.8	15.85	0	82.52	99947000	7	0.52021	1.27719	0	0		Q9Y3D5;H0YAG5;D6RCM2	Q9Y3D5;H0YAG5;D6RCM2	28S ribosomal protein S18c, mitochondrial	MRPS18C
6.22747	7.33648	7.215	7.00497	7.24398	7.03679	6.89561	6.34415	6.87992	6.90125	7.27848	7.17964	7.19176	7.69961	7.19662	6.5877	6.23781	6.5843	6.59123	6.38001	3	3	3	14.4	14.4	14.4	20.616	0	5.065	336760000	14	0.31014	1.00868	0.913775	-1.11394		P82912;H0YL99	P82912	28S ribosomal protein S11, mitochondrial	MRPS11
7.10319	7.17453	6.81004	7.24452	7.02321	6.57235	6.68558	6.58294	6.98115	7.04135	7.0029	7.27031	7.25861	7.59257	7.12701	6.08246	6.69794	6.76733	6.03318	6.16279	7	7	7	25.6	25.6	25.6	47.611	0	50.01	309330000	23	0.338276	0.595223	0.845914	-1.40827		Q92552;G5EA06;D6RH20;E5RJ73;D6RJC7	Q92552;G5EA06;D6RH20	28S ribosomal protein S27, mitochondrial	MRPS27
7.53719	7.6471	7.25008	7.07853	7.28655	7.00664	6.24057	6.1303	6.81743	6.09547	7.42641	7.20287	7.44133	7.29143	7.51399	6.55394	6.40727	6.55698	6.32916	6.40595	7	7	7	38.5	38.5	38.5	24.211	0	19.226	351540000	21	0.0196763	0.0508917	0.00698909	-0.0246486		Q9BYN8	Q9BYN8	28S ribosomal protein S26, mitochondrial	MRPS26
7.81415	7.65633	7.32934	7.32574	7.37251	6.61991	6.43223	6.20441	6.83373	6.17162	7.21442	7.37484	7.32597	7.46401	7.38385	6.22688	6.34546	6.18823	6.34419	6.66862	4	4	4	60.4	60.4	60.4	11.456	0	6.3261	418960000	7	0.312991	-0.488309	0	0		C9JBY7;Q9Y291	C9JBY7;Q9Y291	28S ribosomal protein S33, mitochondrial	MRPS33
6.93959	7.27316	7.08661	7.69817	7.24472	6.1991	6.73056	6.86865	7.02873	7.10127	7.01907	7.52079	7.62642	7.18233	7.20656	6.37322	6.27894	6.45941	6.14965	6.24151	8	8	8	42.2	42.2	42.2	26.332	0	15.46	366070000	16	0.06078	0.207892	1.12455	-1.61151		C9JJ19;P82930	C9JJ19;P82930	28S ribosomal protein S34, mitochondrial	MRPS34
7.15851	7.18224	7.09729	7.15534	6.27804	6.27909	6.4182	6.41134	7.16283	6.07592	7.34185	7.23449	7.34486	7.3274	7.11991	6.23259	6.35476	6.02134	6.37133	6.31255	3	3	3	28.9	28.9	28.9	15.139	0	14.692	265400000	7	0.423047	0.994647	0.315901	-0.700805		O60783	O60783	28S ribosomal protein S14, mitochondrial	MRPS14
6.45343	7.62001	7.13919	7.1656	7.36696	6.28069	5.98304	6.63364	6.12353	6.23779	7.46046	7.17447	7.79215	7.38835	7.7721	6.37095	6.35881	6.81032	6.47659	6.4794	5	5	5	52	52	52	14.226	0	27.853	482730000	21	0.410662	1.22403	0.648041	0.822101		P82932	P82932	28S ribosomal protein S6, mitochondrial	MRPS6
7.31597	6.98258	6.99721	7.35023	7.32102	6.2031	7.00385	6.27905	6.76849	6.30864	7.2407	7.44118	7.42127	7.52953	7.41192	6.39675	6.41139	6.14126	6.30176	6.41411	6	6	6	25	25	25	33.249	0	15.828	339660000	17	0.633462	0.715938	0.315267	-0.596522		Q9Y399;Q5T8A0	Q9Y399;Q5T8A0	28S ribosomal protein S2, mitochondrial	MRPS2
7.18324	7.7122	8.0732	7.88056	7.80437	7.31351	7.49312	7.24721	7.69973	7.48078	7.87612	7.80994	8.0327	7.96111	8.0461	6.79269	6.95345	6.07832	6.5303	6.90008	11	11	11	29.1	29.1	29.1	48.006	0	46.428	1380500000	49	0.315134	0.712491	1.74381	-2.64394		P82675	P82675	28S ribosomal protein S5, mitochondrial	MRPS5
7.89109	7.87002	7.38537	7.42762	7.62655	7.39257	6.92381	6.81045	7.06856	7.22487	7.87387	7.81893	7.91385	7.66633	8.09733	6.81204	6.74636	6.20377	6.33475	6.69988	7	7	5	39	39	27.8	20.843	0	22.287	1011900000	39	0.490973	0.77711	1.27407	-1.74299		Q9Y2Q9;H7C5V3;H0YAT2;E5RFT8;E5RGC7;E5RFH3;E5RK86	Q9Y2Q9;H7C5V3;H0YAT2	28S ribosomal protein S28, mitochondrial	MRPS28
7.31313	7.65684	7.59142	7.42511	7.32809	7.05774	6.99404	7.05308	7.28621	7.2284	7.82645	7.6991	7.68933	7.80931	7.67828	6.63357	6.24384	6.12375	6.34376	6.63537	4	4	4	51.9	51.9	51.9	14.374	0	20.327	717350000	19	1.09702	0.922088	2.0183	-2.41781		E9PE17;I3L0E3;Q9Y2R5	E9PE17;I3L0E3;Q9Y2R5	28S ribosomal protein S17, mitochondrial	MRPS17
8.21651	8.11916	7.80143	7.66111	7.56047	7.04029	6.30166	7.04984	6.9056	6.90128	8.01766	7.44096	7.85552	7.94346	8.02629	6.17793	6.06359	6.38797	6.5245	6.45301	10	10	10	58.4	58.4	58.4	21.77	0	35.693	1186400000	46	0.011648	-0.0496916	1.23653	-1.72187		Q9Y3D9;J3QLR8	Q9Y3D9;J3QLR8	28S ribosomal protein S23, mitochondrial	MRPS23
7.65821	7.89292	7.59334	7.53514	7.50582	7.17286	6.97975	6.77559	7.18529	7.06254	8.2763	7.83232	8.10254	7.97754	8.16125	6.70884	6.55754	6.54463	6.42602	6.39031	10	10	10	63.6	63.6	63.6	20.116	0	54.904	1358000000	46	1.27064	1.43807	1.92903	-1.69332		P82663;E7EPW2	P82663;E7EPW2	28S ribosomal protein S25, mitochondrial	MRPS25
7.88876	7.51319	7.3909	7.3033	7.78993	6.99787	6.85011	7.07423	6.67649	7.04517	7.82561	7.67523	7.91981	8.05235	8.14532	6.4938	6.78148	6.48233	5.75298	6.33203	8	8	3	30.6	30.6	9.2	31.704	0	24.204	1046000000	30	0.723748	1.15087	1.17124	-1.86111		J3QLS3;Q9Y2R9;J3QQS1;J3KSI8	J3QLS3;Q9Y2R9;J3QQS1;J3KSI8	28S ribosomal protein S7, mitochondrial	MRPS7
7.89653	8.0136	7.8719	8.07969	7.89282	7.26543	7.56654	7.20607	7.58404	7.5449	8.15509	8.02772	8.15888	8.14928	8.22863	6.64164	6.33341	6.67866	6.41152	6.8234	16	16	16	46.7	46.7	46.7	45.834	0	248.7	1930400000	109	1.10641	0.641171	2.12173	-2.84248		P82933;H7BZC4	P82933	28S ribosomal protein S9, mitochondrial	MRPS9
7.41197	8.28812	7.90208	7.75454	7.82045	7.04995	6.78681	6.98091	6.99734	6.99516	7.89725	7.68245	8.02784	7.88762	7.94444	6.49807	6.25877	6.31665	6.6498	5.8304	6	6	6	56.9	56.9	56.9	15.345	0	17.315	1343800000	52	0.0565118	0.174369	1.74379	-2.16356		Q9Y3D3;A6ND22	Q9Y3D3;A6ND22	28S ribosomal protein S16, mitochondrial	MRPS16
8.16131	8.31936	8.39227	8.32601	8.38707	7.38677	7.37053	7.67076	7.53134	7.78771	8.17967	8.33868	8.17528	8.46538	8.22935	6.54178	6.58056	6.2538	6.13825	7.23714	17	17	17	55.3	55.3	55.3	45.566	0	108.15	3207000000	99	0.099552	-0.131325	1.82204	-3.31899		P51398;V9GZ03;V9GYL9;V9GYA7;V9GYJ9;V9GZ61;V9GYC9;V9GYW1;V9GY11;V9GYJ3;V9GYF7	P51398;V9GZ03;V9GYL9	28S ribosomal protein S29, mitochondrial	MRPS29
8.03551	8.27969	8.06352	7.97265	7.97983	7.44127	7.36635	7.32356	7.45747	7.18241	8.20197	8.15317	8.25672	8.1248	8.16304	6.80318	6.81167	6.34955	6.16571	6.0165	12	12	12	50.5	50.5	50.5	36.844	0	116.51	2224100000	78	0.502708	0.377708	1.9273	-3.07243		P82673;H0YG82	P82673;H0YG82	28S ribosomal protein S35, mitochondrial	MRPS35
7.97764	8.08447	7.90475	7.92372	8.03615	7.17333	6.89905	6.97347	7.15881	7.01254	7.92882	7.81015	8.0249	8.04798	8.23101	6.38918	6.13907	6.105	6.05158	6.16667	9	9	9	47.3	47.3	47.3	29.395	0	37.72	1586400000	60	0.0472525	0.0771458	2.43933	-2.90051		Q9Y676;A0A0G2JIC6	Q9Y676;A0A0G2JIC6	28S ribosomal protein S18b, mitochondrial	MRPS18B
8.28353	8.45169	8.22115	7.85257	8.22668	7.409	7.39557	7.30421	7.28614	7.58443	8.46439	8.13481	8.41397	8.46752	8.24507	6.51092	6.64569	5.93772	6.62315	6.39442	15	15	15	50.1	50.1	50.1	45.318	0	95.543	3133100000	87	0.253335	0.458519	2.1565	-3.23387		Q92665	Q92665	28S ribosomal protein S31, mitochondrial	MRPS31
8.52826	8.55223	8.51455	8.30612	8.47314	7.82928	7.3963	7.7273	7.66763	7.75047	8.67985	8.47724	8.50711	8.61113	8.62391	6.46968	6.48169	6.21259	6.28075	6.92413	18	18	18	61.8	61.8	61.8	36.805	0	158.4	5176700000	115	0.480203	0.348759	2.41642	-3.98773		G5E9W7;G5E9V5;P82650;H7C5H3;H7C5F2;H7C5L9;C9J5D8	G5E9W7;G5E9V5;P82650;H7C5H3	28S ribosomal protein S22, mitochondrial	MRPS22
7.40742	7.49892	7.74377	8.04767	7.79441	7.40197	7.1944	7.12723	7.71849	7.4641	7.79009	7.79649	8.04096	7.90025	7.64193	6.28131	6.79614	6.56204	6.39794	6.32084	16	16	16	31.6	31.6	31.6	78.549	0	75.257	1165600000	70	0.210601	0.450145	2.04922	-3.02158		Q96EY7;B8ZZQ4	Q96EY7	Pentatricopeptide repeat domain-containing protein 3, mitochondrial	PTCD3
6.88914	7.10243	6.98986	7.05007	7.12281	6.83355	6.68921	6.80895	6.85867	6.33377	6.7084	7.04474	6.99938	6.48484	7.12798	5.97541	6.0847	6.72378	6.41197	6.42139	3	3	3	12.8	12.8	12.8	21.514	0	4.4946	185700000	18	0.276362	-0.524175	0.875012	-1.26693		Q9NZE8;D3YTC1	Q9NZE8;D3YTC1	39S ribosomal protein L35, mitochondrial	MRPL35
6.85228	6.72309	6.79819	7.09156	7.22394	6.62384	6.86834	6.61002	6.79199	6.69121	6.73078	6.79128	7.10459	6.81148	7.37157	6.56851	6.40266	6.45093	6.22018	6.27654	3	3	3	21.5	21.5	21.5	17.442	0	9.0186	192560000	10	0.025512	0.0801447	1.64278	-1.10726		Q9BYC9;I3L2X1	Q9BYC9;I3L2X1	39S ribosomal protein L20, mitochondrial	MRPL20
6.81819	6.50438	6.92228	6.82094	6.95506	6.67799	6.82997	6.40528	6.85076	6.68074	6.95741	7.2774	6.81526	7.13666	7.04833	6.59035	6.52711	6.09753	6.38604	6.46805	3	3	3	19.5	19.5	19.5	22.814	0	13.094	186910000	21	0.605952	0.806698	0.892113	-0.91396		Q7Z2W9;H3BUY0	Q7Z2W9	39S ribosomal protein L21, mitochondrial	MRPL21
8.01502	7.86519	7.87852	7.84163	7.835	7.59184	7.68689	7.5085	7.71482	7.7057	8.22045	7.63144	7.91648	7.76553	7.99227	7.56721	7.32936	7.26264	6.31156	7.388	10	10	10	36.7	36.7	36.7	33.3	0	66.827	1660600000	42	0.0272682	0.0603179	0.770414	-1.56063		Q5T653;C9IY40;C9JZW2;C9JZG7	Q5T653;C9IY40	39S ribosomal protein L2, mitochondrial	MRPL2
7.33668	7.4414	7.35222	7.2141	7.36243	6.36815	6.44371	6.5701	7.04017	6.10258	7.69431	7.18486	7.23109	7.38308	7.34406	6.28484	6.74418	6.8973	6.52296	6.47053	1	1	1	11.7	11.7	11.7	14.882	0.00032216	4.3827	392220000	13	0.040458	0.0867529	0.0925135	0.262503		S4R360;J3KPP0;S4R2Z7;Q9Y6G3	S4R360;J3KPP0;S4R2Z7;Q9Y6G3	39S ribosomal protein L42, mitochondrial	MRPL42
7.89743	8.1507	8.09785	8.13072	8.11647	8.02784	8.01258	7.94146	8.15836	8.03427	8.39912	8.23729	8.24697	8.3257	8.36752	7.70184	7.65913	7.56253	7.20164	7.42491	16	16	16	45.6	45.6	45.6	38.711	0	78.755	3402300000	95	1.27193	0.786255	1.91768	-1.74365		Q9NYK5;C9JG87	Q9NYK5;C9JG87	39S ribosomal protein L39, mitochondrial	MRPL39
7.62621	7.65224	7.44083	6.30606	7.65206	7.18811	6.97709	7.27149	7.09971	7.11634	8.1675	6.76184	7.63124	7.61723	7.66624	6.12334	6.84687	6.92963	6.93224	6.85722	4	4	4	25	25	25	20.576	0	6.3896	812870000	11	0.118664	0.775102	0.920409	-1.30449		Q9H0U6	Q9H0U6	39S ribosomal protein L18, mitochondrial	MRPL18
7.69236	7.78919	7.30166	7.25964	7.3733	7.02804	6.7121	7.12711	7.08615	7.01695	7.46371	7.30443	7.4996	7.58618	7.51028	6.96662	6.71992	6.89245	6.11501	6.48259	3	3	3	23.5	23.5	23.5	19.198	0	12.336	565920000	22	0.0115561	-0.0345155	0.768989	-1.19174		Q13405;H0YDP7;E9PI78;E9PNF1	Q13405;H0YDP7	39S ribosomal protein L49, mitochondrial	MRPL49
7.99857	7.93301	7.92417	7.92789	7.94896	7.63845	7.47831	7.53542	7.93386	7.70339	8.03747	8.07081	8.13513	8.04505	7.92974	7.21413	7.46225	7.21572	7.0639	7.02325	14	14	14	47.1	47.1	47.1	44.596	0	55.252	1803900000	88	0.80106	0.322627	1.64558	-1.53486		Q96DV4	Q96DV4	39S ribosomal protein L38, mitochondrial	MRPL38
8.11671	8.13226	8.18994	8.02127	8.23025	7.92134	8.0898	7.93194	8.08622	7.91627	8.38102	8.17719	8.32469	8.35023	8.46836	7.71886	7.51079	7.51964	7.25873	7.43332	9	9	9	30.4	30.4	30.4	29.613	0	49.174	3752400000	106	1.04404	0.671744	1.96033	-1.66377		Q5QPA5;Q9NVS2	Q5QPA5;Q9NVS2	28S ribosomal protein S18a, mitochondrial	MRPS18A
7.54952	7.27434	6.94289	7.02015	6.94983	6.74501	5.99069	6.99245	6.73743	6.33503	7.31435	7.17554	7.16218	7.23231	7.27272	6.3719	6.32989	6.36607	6.47035	6.3528	6	6	6	34.4	34.4	34.4	30.156	0	24.518	265660000	25	0.12307	0.279286	0.29057	-0.604326		Q13084;A2IDC7;Q4TT37;A2IDC6	Q13084;A2IDC7;Q4TT37;A2IDC6	39S ribosomal protein L28, mitochondrial	MRPL28
8.26105	8.74771	8.573	8.44174	8.56545	8.32779	8.24917	8.2723	8.41431	8.39801	8.79391	8.58341	8.67851	8.67167	8.73129	8.07353	7.87969	7.9085	7.53377	7.68069	20	20	20	60.1	60.1	60.1	33.419	0	146.28	8042800000	215	0.531003	0.577918	1.88279	-1.71771		Q9P015;E5RIZ4;E5RHF4	Q9P015;E5RIZ4;E5RHF4	39S ribosomal protein L15, mitochondrial	MRPL15
8.14073	8.19838	8.25205	8.0223	8.20041	7.79314	7.72161	7.87677	8.03515	7.90346	8.35209	8.12057	8.32147	8.3134	8.20917	7.50545	7.46801	7.27021	7.39227	7.22789	10	10	10	35.5	35.5	35.5	40.47	0	57.007	3111500000	84	0.447533	0.33407	2.0814	-1.63858		H0Y9G6;E7ETU7;P09001;E9PF06;D6RC14;D6RBQ5	H0Y9G6;E7ETU7;P09001;E9PF06;D6RC14	39S ribosomal protein L3, mitochondrial	MRPL3
8.09444	8.55008	8.49734	8.2331	8.4809	8.21861	8.30049	8.1259	8.44127	8.25161	8.52078	8.57323	8.56493	8.61945	8.45449	7.91797	7.73502	7.83276	7.3413	7.43857	14	14	14	64	64	64	34.919	0	159.69	5848900000	154	0.509627	0.582684	1.82105	-2.04117		Q9BYD3;K7ES61;X6RAY8;K7ELQ0;K7EKI4;K7ELF1;K7EJ73	Q9BYD3;K7ES61;X6RAY8;K7ELQ0	39S ribosomal protein L4, mitochondrial	MRPL4
8.25749	8.46756	8.32842	8.03431	8.25522	8.09611	7.77308	7.82796	7.90133	7.97327	8.32209	8.34716	8.3744	8.40188	8.35776	7.71774	7.60001	7.51146	6.98659	7.40487	13	13	13	43.1	43.1	43.1	35.29	0	65.8	3803300000	104	0.289636	0.305813	1.33566	-1.56203		A0A087X2D5;Q9BRJ2;A0A0G2JMS5;A0A087WU62	A0A087X2D5;Q9BRJ2;A0A0G2JMS5;A0A087WU62	39S ribosomal protein L45, mitochondrial	MRPL45
8.42202	8.58781	8.45487	8.32713	8.50266	8.15183	8.0599	8.07817	8.11707	8.14687	8.58425	8.49129	8.51529	8.67104	8.66148	7.96094	7.80533	7.6692	7.3022	7.57801	12	12	12	71.3	71.3	71.3	20.692	0	85.023	6220600000	151	0.621503	0.41781	1.56006	-1.487		Q9BYD1;E5RJI7;H0YAX3;E5RFI2	Q9BYD1;E5RJI7	39S ribosomal protein L13, mitochondrial	MRPL13
7.81842	7.96588	7.86008	7.68408	7.67449	7.63945	7.44137	7.21357	7.10921	7.48176	7.86182	7.90129	7.75517	8.03993	7.95321	7.31714	7.09927	7.09736	6.48976	6.84803	4	4	4	31	31	31	15.947	0	13.632	1289800000	50	0.322823	0.337815	0.908763	-1.35122		Q6P1L8	Q6P1L8	39S ribosomal protein L14, mitochondrial	MRPL14
8.0003	8.24296	8.22645	8.25339	8.11826	7.90861	8.16563	7.97678	8.29327	7.77903	8.21479	8.31461	8.18786	8.35946	8.25464	7.47183	7.54805	7.14836	7.16074	7.2664	25	25	25	66.4	66.4	66.4	48.117	0	138.31	3269600000	111	0.43421	0.325542	1.96241	-2.34392		Q9BZE1;S4R369;A6NHR2;H0Y4J2	Q9BZE1;S4R369	39S ribosomal protein L37, mitochondrial	MRPL37
8.09244	8.25602	8.14579	7.86935	8.11687	7.88102	7.77185	7.62164	7.70477	7.74507	8.21181	8.12388	8.21611	8.26141	8.37434	7.59149	7.37745	7.27288	7.05911	7.11548	15	15	15	49.4	49.4	49.4	30.243	0	112.01	2771700000	117	0.503055	0.469784	1.74412	-1.53337		Q9BYD2;Q5SZR1;A0A1W2PPE5;A0A1W2PQB6;A0A1W2PS92	Q9BYD2;Q5SZR1	39S ribosomal protein L9, mitochondrial	MRPL9
7.88978	7.81811	7.85932	7.63844	7.80703	7.42519	7.42719	7.441	7.59652	7.42043	8.05496	7.79888	7.98164	8.05007	7.92521	7.28923	7.26972	6.92272	6.65108	6.86534	10	10	10	40.2	40.2	40.2	28.449	0	31.385	1430500000	73	0.726404	0.530229	1.43496	-1.53622		Q9NX20;E9PI14	Q9NX20	39S ribosomal protein L16, mitochondrial	MRPL16
7.25139	6.8712	7.00048	6.88554	7.09426	6.9532	6.59912	6.85486	6.74304	6.79575	7.82854	7.24485	6.82311	7.43952	7.36556	6.63649	6.50318	6.56007	5.9363	6.09037	4	4	4	40.7	40.7	40.7	12.77	0	13.98	354870000	14	0.481166	1.06216	1.14365	-1.47464		F5H702;Q96GC5;F5H8D0	F5H702;Q96GC5	39S ribosomal protein L48, mitochondrial	MRPL48
7.43191	7.7804	7.36831	6.86065	7.4815	6.92741	6.17181	6.68048	6.87937	6.36144	7.49315	7.43704	7.68112	7.72907	7.65308	6.7217	6.29212	6.69896	6.42539	6.7383	8	8	8	50.5	50.5	50.5	20.683	0	49.712	524200000	29	0.308151	0.711354	0.0339491	-0.0956934		Q9Y3B7;E9PQB6;H0YCD5	Q9Y3B7	39S ribosomal protein L11, mitochondrial	MRPL11
7.47547	7.52271	7.26114	7.33469	7.29252	6.96409	6.97837	6.91739	7.2752	7.34626	7.68605	7.37513	7.73876	7.38185	7.87065	6.78462	6.53064	6.72228	6.35574	6.41441	5	5	5	39.1	39.1	39.1	18.546	0	16.992	595330000	32	0.568953	0.774617	1.72404	-1.77631		Q8TCC3;B8ZZV5	Q8TCC3	39S ribosomal protein L30, mitochondrial	MRPL30
7.79401	7.86588	7.61977	7.84845	7.84407	7.31342	7.03177	7.24346	7.90545	7.31205	7.7192	7.645	8.26172	7.91966	7.8605	7.26574	6.9061	6.876	6.70104	6.38052	12	12	12	41.2	41.2	41.2	29.45	0	32.541	1348900000	62	0.137512	0.288268	1.0095	-1.77839		Q9HD33	Q9HD33	39S ribosomal protein L47, mitochondrial	MRPL47
7.84699	8.00135	7.78834	8.17627	8.12607	7.78942	7.93415	7.59355	8.23239	7.80215	8.0677	8.11039	8.14179	8.05285	8.16841	7.19836	7.18631	7.12982	6.73897	7.00779	13	13	13	43.5	43.5	43.5	33.535	0	29.711	2289300000	57	0.369534	0.40005	1.95267	-2.71762		P49406;S4R3W9;A0A0A0MRF4;S4R455;H7C2J0	P49406;S4R3W9	39S ribosomal protein L19, mitochondrial	MRPL19
8.37585	8.50738	8.28005	8.12772	8.28773	7.87282	7.57726	7.97198	7.86388	7.98225	8.27441	8.34717	8.19945	8.51367	8.35305	7.65718	7.37709	7.36003	6.75525	7.18693	12	12	12	65.3	65.3	65.3	24.915	0	60.21	3871500000	99	0.0409565	0.0724315	1.39603	-1.94779		Q96A35;X6RJ73;X6RHI2;X6RIR5	Q96A35;X6RJ73	39S ribosomal protein L24, mitochondrial	MRPL24
8.01077	8.03751	7.6806	7.44231	7.60019	7.20871	6.44129	6.82948	7.29853	6.71502	7.84495	7.6823	7.6414	7.76889	7.69893	6.85191	6.75849	6.46754	6.41952	6.70493	8	8	8	41.7	41.7	41.7	20.05	0	63.091	889340000	46	0.0357233	-0.0896244	0.469231	-0.857487		Q9NRX2;E9PKV2	Q9NRX2;E9PKV2	39S ribosomal protein L17, mitochondrial	MRPL17
7.63823	7.92874	7.69219	7.63101	7.80336	7.31357	6.45163	7.27319	7.1428	7.35334	7.86266	7.66879	7.69844	7.84938	7.68493	7.35832	6.34104	6.69376	6.52121	6.38251	4	4	4	17	17	17	21.405	0	10.094	959530000	26	0.0315289	0.0469459	0.634227	-1.48669		Q9BYC8	Q9BYC8	39S ribosomal protein L32, mitochondrial	MRPL32
7.68802	7.82394	7.59153	7.59737	7.60682	7.26269	7.23603	7.19879	7.6952	7.32426	8.10016	7.67833	7.91436	7.98484	8.0924	7.1661	7.13659	7.20887	6.3862	6.33038	6	6	6	62.8	62.8	62.8	15.383	0	61.295	1296700000	46	0.995877	0.971614	0.852776	-1.65354		Q8IXM3	Q8IXM3	39S ribosomal protein L41, mitochondrial	MRPL41
7.86451	7.73591	7.57581	7.80992	7.67707	7.54899	7.52727	7.49357	7.68625	7.52963	7.8887	8.03643	7.97783	7.93033	7.9921	6.9885	6.96973	7.0406	6.58421	6.58803	9	9	9	28.6	28.6	28.6	37.535	0	25.399	1467800000	62	1.22649	0.772123	2.14688	-2.40152		Q9H9J2	Q9H9J2	39S ribosomal protein L44, mitochondrial	MRPL44
7.3407	7.83397	5.95654	6.57801	6.41903	5.91903	6.15523	6.18454	6.05863	6.21796	7.66613	7.37805	7.29155	7.50289	7.50908	6.36467	6.96672	6.16554	6.12395	6.0385	4	4	4	21.3	21.3	21.3	18.657	0	17.276	420870000	16	0.502336	2.13896	0.394217	0.746774		H0Y6Y8;B1AL05;Q8N983;H0YBU8;M0R051	H0Y6Y8;B1AL05;Q8N983;H0YBU8	39S ribosomal protein L43, mitochondrial	MRPL43
7.26666	7.68759	7.25633	6.68874	7.02061	6.86957	6.23898	6.23579	6.382	6.12563	7.74568	7.29139	7.6084	7.63878	7.64178	6.59476	6.33909	6.06866	7.06008	6.09381	3	3	3	48.6	48.6	48.6	15.819	0	51.966	480260000	22	0.620667	1.33283	0.0568315	0.202255		Q6P161	Q6P161	39S ribosomal protein L54, mitochondrial	MRPL54
7.9406	7.97446	7.85015	7.50401	7.87063	7.52123	6.97297	7.28896	7.13535	7.20906	7.91003	7.83058	7.68771	8.11893	8.07907	7.09241	6.77769	6.77616	6.56557	6.61656	5	5	5	41.2	41.2	41.2	14.731	0	18.486	1317400000	51	0.158578	0.323202	1.40305	-1.52755		H7C5U8;Q9P0M9;D6RAN8;D6RE11;B3KN43	H7C5U8;Q9P0M9;D6RAN8	39S ribosomal protein L27, mitochondrial	MRPL27
8.00346	8.21336	8.09597	7.86778	8.09051	7.62714	7.48722	7.75269	7.43647	7.67602	8.32207	8.09649	8.20523	8.23644	8.25419	7.26359	7.2809	7.02963	6.74627	6.76979	11	11	11	45.2	45.2	45.2	36.908	0	107.89	2419600000	110	0.724154	0.560308	1.74098	-1.91965		Q9BYD6;H0Y8N7	Q9BYD6;H0Y8N7	39S ribosomal protein L1, mitochondrial	MRPL1
7.77312	7.96312	7.74337	7.54197	7.91163	7.48647	6.91285	7.55112	7.57185	7.35097	8.01674	7.87801	7.83589	8.10158	8.03068	7.05869	6.84467	6.84784	6.45895	6.60839	6	6	6	72.3	72.3	72.3	12.107	0	70.744	1409700000	59	0.572263	0.617677	1.48313	-2.02951		Q96EL3;B9A051	Q96EL3	39S ribosomal protein L53, mitochondrial	MRPL53
7.93148	8.07041	7.88861	7.66922	7.85435	7.15703	7.07148	7.36074	7.7551	7.26342	8.17394	7.96058	8.04112	7.97147	8.0302	7.13178	6.84687	6.88351	6.64785	6.58065	6	6	6	54.2	54.2	54.2	17.781	0	55.035	1584600000	53	0.548459	0.50708	1.27495	-1.67233		Q16540;A6NJD9;A8MVT4;A8MYK1;H7C2P7	Q16540;A6NJD9;A8MVT4;A8MYK1;H7C2P7	39S ribosomal protein L23, mitochondrial	MRPL23
7.90492	8.03651	7.83624	7.72034	7.92416	7.72428	7.278	7.37883	7.37425	7.46057	8.01523	7.93652	7.97299	8.08668	7.86064	7.12821	6.87574	6.92453	6.39312	6.41872	9	9	9	42.5	42.5	42.5	24.325	0	44.574	1487800000	63	0.32127	0.298901	1.66682	-2.30915		E7ESL0;J3KQY1;Q9NWU5	E7ESL0;J3KQY1;Q9NWU5	39S ribosomal protein L22, mitochondrial	MRPL22
7.59846	7.97065	7.33646	7.61482	7.43144	6.40099	6.2675	6.83036	7.56526	6.92344	7.86484	7.5286	7.93199	7.6401	7.8956	6.24146	6.67296	6.79882	6.70942	6.28038	8	8	8	49.1	49.1	49.1	31.705	0	63.534	852330000	43	0.31191	0.604119	0.285916	-0.853412		Q9H2W6;A0A087WT90;H0YN64;A0A087WT51	Q9H2W6;A0A087WT90	39S ribosomal protein L46, mitochondrial	MRPL46
7.50697	8.05983	7.52402	7.6921	7.6649	7.3977	7.19485	7.3769	7.5083	7.23965	8.03755	8.03443	8.14016	7.9983	8.00204	6.63771	7.05242	6.99042	6.34398	6.57167	5	5	5	28	28	28	29.282	0	24.476	1317200000	61	1.05046	1.17242	1.69644	-2.07367		Q7Z7H8	Q7Z7H8	39S ribosomal protein L10, mitochondrial	MRPL10
8.18673	8.31875	7.76734	7.67703	7.80096	7.42697	7.33911	7.28128	7.68399	7.60734	8.08156	7.98617	8.12707	8.22167	8.13348	7.22701	6.82588	7.02657	6.46926	6.35952	5	5	5	25.7	25.7	25.7	24.49	0	13.057	1870000000	37	0.261961	0.530935	1.48218	-2.27913		Q9NQ50	Q9NQ50	39S ribosomal protein L40, mitochondrial	MRPL40
7.46664	7.74578	7.54504	7.17362	7.70375	6.76595	6.2706	6.72367	6.96641	6.55174	7.80343	7.54331	7.91585	7.60265	7.87804	6.63844	6.29201	6.31078	6.41868	6.42751	5	5	5	20.3	20.3	20.3	15.128	0	14.256	723380000	27	0.460015	0.736434	0.638843	-0.791246		Q7Z7F7;X6R631;X6RIW1	Q7Z7F7	39S ribosomal protein L55, mitochondrial	MRPL55
7.82799	7.68637	7.45408	7.10027	7.52727	6.75304	6.65795	6.67408	6.85349	6.89161	7.75939	7.83824	7.89502	7.81195	7.86521	6.83824	6.44923	6.57338	6.24269	6.16011	6	6	6	59.5	59.5	59.5	18.325	0	18.472	831110000	42	0.739401	1.04563	0.91912	-1.04077		Q8N5N7	Q8N5N7	39S ribosomal protein L50, mitochondrial	MRPL50
7.65321	7.50721	7.2145	6.97302	7.42589	6.78851	6.54959	6.63103	6.94139	6.54655	7.85874	7.46464	7.95426	7.65693	8.02629	6.81525	6.30967	6.21397	6.18592	6.13176	7	7	7	39.2	39.2	39.2	25.384	0	27.351	744190000	44	0.825843	1.45303	0.947401	-1.19623		Q8TAE8	Q8TAE8	Growth arrest and DNA damage-inducible proteins-interacting protein 1	GADD45GIP1
7.90727	8.01081	7.99057	7.49076	7.93004	7.65832	7.39046	7.25926	7.25892	7.29732	8.16122	7.94832	8.09255	8.22601	8.19537	7.27586	7.33897	6.95695	6.60166	6.7939	8	8	8	32.8	32.8	32.8	21.905	0	25.383	1800400000	47	0.694907	0.859734	0.908108	-1.2603		J3KS15;Q14197;J3QRF8	J3KS15;Q14197	Peptidyl-tRNA hydrolase ICT1, mitochondrial	ICT1
7.83318	8.02284	8.10312	6.31219	8.17336	7.63074	6.14807	6.89782	7.63345	6.76316	8.17284	7.80688	7.99144	8.19986	7.75363	6.43124	7.51996	7.85016	6.4964	7.51278	2	2	2	30.4	30.4	30.4	12.266	0	4.6103	2428500000	12	0.154174	0.983264	0.0803936	0.489848		Q9BQC6	Q9BQC6	Ribosomal protein 63, mitochondrial	MRPL57

## Sheet: Sheet2
LFQ intensity control-37#1	LFQ intensity control-37#2	LFQ intensity control-37#3	LFQ intensity contol-37#4	LFQ intensity JH-37#5	LFQ intensity control-45#1	LFQ intensity control-45#2	LFQ intensity control-45#3	LFQ intensity control-45#4	LFQ intensity control-45#5	LFQ intensity delTA37#1	LFQ intensity delTA37#2	LFQ intensity delTA37#3	LFQ intensity delTA37#4	LFQ intensity delTA37#5	LFQ intensity delTA45#1	LFQ intensity delTA45#2	LFQ intensity delTA45#3	LFQ intensity delTA45#4	LFQ intensity delTA45#5									Peptides	Razor + unique peptides	Unique peptides	Sequence coverage [%]	Unique + razor sequence coverage [%]	Unique sequence coverage [%]	Mol. weight [kDa]	Q-value	Score	Intensity	MS/MS count		Student's T-test q-value dTA37_JH37			-LOG10 q value delTA /control 37		Student's T-test Difference dTA37_JH37				LOG2 fold change delTA/control 37
LFQ intensity JH-37-1	LFQ intensity JH-37-2	LFQ intensity JH-37-3	LFQ intensity JH-37-4	LFQ intensity JH-37-5	LFQ intensity JH-45-1	LFQ intensity JH-45-2	LFQ intensity JH-45-3	LFQ intensity JH-45-4	LFQ intensity JH-45-5	LFQ intensity dTA37-1	LFQ intensity dTA37-2	LFQ intensity dTA37-3	LFQ intensity dTA37-4	LFQ intensity dTA37-5	LFQ intensity dTA45-1	LFQ intensity dTA45-2	LFQ intensity dTA45-3	LFQ intensity dTA45-4	LFQ intensity dTA45-5									Peptides	Razor + unique peptides	Unique peptides	Sequence coverage [%]	Unique + razor sequence coverage [%]	Unique sequence coverage [%]	Mol. weight [kDa]	Q-value	Score	Intensity	MS/MS count		Student's T-test q-value dTA37_JH37					Student's T-test Difference dTA37_JH37
7.40742	7.49892	7.74377	8.04767	7.79441	7.40197	7.1944	7.12723	7.71849	7.4641	7.79009	7.79649	8.04096	7.90025	7.64193	6.28131	6.79614	6.56204	6.39794	6.32084									16	16	16	31.6	31.6	31.6	78.549	0	75.257	1165600000	70		0.615742					0.135507
7.65321	7.50721	7.2145	6.97302	7.42589	6.78851	6.54959	6.63103	6.94139	6.54655	7.85874	7.46464	7.95426	7.65693	8.02629	6.81525	6.30967	6.21397	6.18592	6.13176									7	7	7	39.2	39.2	39.2	25.384	0	27.351	744190000	44		0.149333					0.437404
7.90727	8.01081	7.99057	7.49076	7.93004	7.65832	7.39046	7.25926	7.25892	7.29732	8.16122	7.94832	8.09255	8.22601	8.19537	7.27586	7.33897	6.95695	6.60166	6.7939									8	8	8	32.8	32.8	32.8	21.905	0	25.383	1800400000	47		0.20188					0.258806
7.83318	8.02284	8.10312	6.31219	8.17336	7.63074	6.14807	6.89782	7.63345	6.76316	8.17284	7.80688	7.99144	8.19986	7.75363	6.43124	7.51996	7.85016	6.4964	7.51278									2	2	2	30.4	30.4	30.4	12.266	0	4.6103	2428500000	12		0.701175					0.295992
